# Supplementary material for: Incident Coronary Heart Disease After Preeclampsia: Role of Reduced Fetal Growth, Preterm Delivery, and Parity
Source: PubMed Central journal article supplement (PMC5523993; doi:10.1161/jaha.116.004158), 2017-03-06
Supplement: JAH3-6-e004158-s001.pdf [file JAH3-6-e004158-s001.pdf]

## **SUPPLEMENTAL MATERIAL**

Table S1. Preeclampsia and Subsequent Risk of Major Coronary Events Among 504,623 Women With 1 to 5 Singleton Deliveries and a First Delivery During 1980–2002 After Exclusion of Women With a Diagnosis of Diabetes Mellitus\*

|                                             | No./Events   | Unadjusted       |         | Adjusted†        |         |
|---------------------------------------------|--------------|------------------|---------|------------------|---------|
|                                             |              | HR (95% CI)      | P value | HR (95% CI)      | P value |
| <b>Major coronary event</b>                 |              |                  |         |                  |         |
| No preeclampsia                             | 475 160/1063 | 1                | ...     | 1                | ...     |
| Preeclampsia only                           | 19 417/83    | 2.07 (1.66–2.59) | <0.001  | 2.05 (1.64–2.56) | <0.001  |
| Preeclampsia + SGA and/or preterm delivery‡ | 10 046/76    | 3.68 (2.92–4.65) | <0.001  | 3.58 (2.84–4.52) | <0.001  |
| Preeclampsia + SGA                          | 4480/35      | 3.39 (2.42–4.75) | <0.001  | 3.21 (2.29–4.49) | <0.001  |
| Preeclampsia + preterm delivery             | 3123/20      | 3.77 (2.42–5.87) | <0.001  | 3.91 (2.51–6.09) | <0.001  |
| Preeclampsia + SGA + preterm delivery       | 2442/21      | 4.19 (2.72–6.45) | <0.001  | 4.05 (2.62–6.24) | <0.001  |

Cox–regression analysis with preeclampsia as a time–dependent covariate. HR indicates hazard ratio; CI, confidence interval; SGA, small for gestational age (<10<sup>th</sup> percentile).

\* Diabetes mellitus occurring prior to first pregnancy.

† Adjusted for education, marital status and birth year of first child.

‡ <37 weeks of gestation.

Table S2. Preeclampsia and Subsequent Risk of Major Coronary Events Among 506,397 Women With 1 to 5 Singleton Deliveries and a First Delivery During 1980–2002 With a Lower Cutoff Point for Small For Gestational Age and Preterm Delivery

|                                             | No./Events   | Unadjusted        |         | Adjusted†         |         |
|---------------------------------------------|--------------|-------------------|---------|-------------------|---------|
|                                             |              | HR (95% CI)       | P value | HR (95% CI)       | P value |
| <b>Major coronary event</b>                 |              |                   |         |                   |         |
| No preeclampsia                             | 476 506/1095 | 1                 | ...     | 1                 | ...     |
| Preeclampsia only                           | 22 815/114   | 2.39 (1.97-2.90)  | <0.001  | 2.36 (1.94-2.86)  | <0.001  |
| Preeclampsia + SGA and/or preterm delivery‡ | 7056/66      | 4.26 (3.32-5.46)  | <0.001  | 4.09 (3.19-5.25)  | <0.001  |
| Preeclampsia + SGA                          | 4886/41      | 3.59 (2.62-4.90)  | <0.001  | 3.41 (2.50-4.66)  | <0.001  |
| Preeclampsia + preterm delivery             | 1265/15      | 6.77 (4.07-11.27) | <0.001  | 6.96 (4.18-11.59) | <0.001  |
| Preeclampsia + SGA + preterm delivery       | 925/10       | 5.40 (2.89-10.07) | <0.001  | 5.13 (2.75-9.57)  | <0.001  |

Cox–regression analysis with preeclampsia as a time–dependent covariate. HR indicates hazard ratio; CI, confidence interval; SGA, small for gestational age (<7.5<sup>th</sup> percentile).

† Adjusted for education, marital status and birth year of first child.

‡ <34 weeks of gestation.
